# Supplementary material for: Transcriptome-Assisted SNP Marker Discovery for Phytophthora infestans Resistance in Solanum lycopersicum L
Source: MDPI journal article supplement (doi:10.3390/ijms24076798), 2023-04-05
Supplement: s1 [file s1]

**Table S1.** Mapping percentage of control and infected samples to *Phytophthora infestans* genome (NCBI genome ID- ASM14294v1).

| Sample                 | Percentage of reads mapping to <i>Phytophthora infestans</i> genome |
|------------------------|---------------------------------------------------------------------|
| Control Resistant 1    | 0.66%                                                               |
| Control Resistant 2    | 0.30%                                                               |
| Control Susceptible 1  | 0.43%                                                               |
| Control Susceptible 2  | 0.19%                                                               |
| Infected Resistant 1   | 0.75%                                                               |
| Infected Resistant 2   | 0.35%                                                               |
| Infected Susceptible 1 | 7.05%                                                               |
| Infected Susceptible 2 | 5.37%                                                               |

**Table S2.** Summary of screened SNPs across all public domain dataset. ‘\*’ shows the presence of alternative SNP allele.

| Chromosome  | Location | Stupice | Brandywine Red | Matt’ s Wild Cherry | Prudens Purple | Legend | Cherry Roma | Green Zebra | Mr. Stripey | Lemon Drop | Mexico Midget | NC1-CELBR | LA2093 | LA1673 | San Marzano | Castle rock | Money Maker | LA4084 | Total frequency in resistant (13) | Total frequency in susceptible (4) | Gene ID (SL3.0 Refseq) |
|-------------|----------|---------|----------------|---------------------|----------------|--------|-------------|-------------|-------------|------------|---------------|-----------|--------|--------|-------------|-------------|-------------|--------|-----------------------------------|------------------------------------|------------------------|
| NC_015438.3 | 303295   | *       |                | *                   | *              | *      |             |             |             |            | *             | *         |        | *      |             |             |             |        | 7                                 | 0                                  | LOC101251912           |
| NC_015446.3 | 72501667 | *       |                | *                   | *              |        |             |             |             |            | *             | *         | *      | *      |             |             |             |        | 6                                 | 0                                  | LOC101055591           |
| NC_015446.3 | 72500390 | *       |                |                     |                |        |             |             |             |            | *             | *         | *      | *      |             |             |             |        | 5                                 | 0                                  | LOC101055591           |
| NC_015446.3 | 72501893 | *       |                |                     |                |        |             |             |             |            | *             | *         | *      | *      |             |             |             |        | 5                                 | 0                                  | LOC101055591           |
| NC_015446.3 | 72502022 | *       |                |                     |                |        |             |             |             |            | *             | *         | *      | *      |             |             |             |        | 5                                 | 0                                  | LOC101055591           |
| NC_015446.3 | 72502108 | *       |                |                     |                |        |             |             |             |            | *             | *         | *      | *      |             |             |             |        | 5                                 | 0                                  | LOC101055591           |
| NC_015446.3 | 72503137 | *       |                |                     |                |        |             |             |             |            | *             | *         | *      | *      |             |             |             |        | 5                                 | 0                                  | LOC101055591           |
| NC_015446.3 | 71869913 | *       |                |                     |                |        |             | *           |             |            |               | *         |        |        |             |             |             |        | 4                                 | 0                                  | LOC101055591           |
| NC_015446.3 | 72502973 | *       |                |                     |                |        |             |             |             |            | *             | *         |        | *      |             |             |             |        | 4                                 | 0                                  | LOC101055591           |
| NC_015446.3 | 11276260 |         |                |                     |                |        |             |             | *           | *          | *             |           | *      | *      |             |             |             |        | 4                                 | 0                                  | LOC101259360           |
| NC_015446.3 | 71737403 | *       |                |                     |                |        |             |             |             |            | *             | *         |        |        |             |             |             |        | 3                                 | 0                                  | LOC101267227           |
| NC_015446.3 | 72006954 | *       |                |                     |                |        |             |             |             |            | *             | *         |        |        |             |             |             |        | 3                                 | 0                                  | LOC101249573           |
| NC_015446.3 | 72461464 | *       |                |                     |                |        |             |             |             |            | *             | *         |        |        |             |             |             |        | 3                                 | 0                                  | LOC101263749           |
| NC_015446.3 | 72462159 | *       |                |                     |                |        |             |             |             |            | *             | *         |        |        |             |             |             |        | 3                                 | 0                                  | LOC101263749           |
| NC_015446.3 | 72672774 | *       |                |                     |                |        |             |             |             |            | *             | *         |        |        |             |             |             |        | 3                                 | 0                                  | LOC101257900           |

|             |          |   |   |   |   |   |   |   |  |   |   |   |  |   |  |   |   |   |   |              |
|-------------|----------|---|---|---|---|---|---|---|--|---|---|---|--|---|--|---|---|---|---|--------------|
| NC_015446.3 | 72674213 | * |   |   |   |   |   |   |  |   | * | * |  |   |  |   |   | 3 | 0 | LOC101257900 |
| NC_015446.3 | 72499807 | * |   |   |   |   |   |   |  |   | * | * |  |   |  |   |   | 3 | 0 | LOC101055591 |
| NC_015446.3 | 72674213 | * |   |   |   |   |   |   |  |   | * | * |  |   |  |   |   | 3 | 0 | LOC101257900 |
| NC_015444.3 | 1496621  |   |   |   |   |   |   |   |  |   |   | * |  | * |  |   |   | 2 | 0 | LOC100191137 |
| NC_015444.3 | 1927318  | * |   |   | * |   |   |   |  |   |   |   |  |   |  |   |   | 2 | 0 | LOC101251003 |
| NC_015445.3 | 54359369 |   |   |   |   |   |   | * |  |   |   |   |  | * |  |   |   | 2 | 0 | LOC101267596 |
| NC_015445.3 | 54359478 |   |   |   |   |   |   | * |  |   |   |   |  | * |  |   |   | 2 | 0 | LOC101268596 |
| NC_015445.3 | 54359866 |   |   |   |   |   |   | * |  |   |   |   |  | * |  |   |   | 2 | 0 | LOC101268596 |
| NC_015446.3 | 72503654 |   | * |   |   |   |   |   |  |   |   | * |  |   |  |   |   | 2 | 0 | LOC101055591 |
| NC_015445.3 | 54359647 |   |   |   |   |   |   |   |  |   |   |   |  | * |  |   |   | 1 | 0 | LOC101267596 |
| NC_015445.3 | 54359914 |   |   |   |   |   |   | * |  |   |   |   |  |   |  |   |   | 1 | 0 | LOC101268596 |
| NC_015446.3 | 72503161 |   |   |   |   |   |   |   |  |   |   | * |  |   |  |   |   | 1 | 0 | LOC101055591 |
| NC_015446.3 | 11275175 |   |   |   |   |   |   |   |  |   |   |   |  | * |  |   |   | 1 | 0 | LOC101259360 |
| NC_015438.3 | 679178   |   |   |   |   |   |   |   |  |   |   |   |  |   |  |   |   | 0 | 0 | LOC101264357 |
| NC_015441.3 | 55622649 |   | * | * |   | * | * |   |  | * |   |   |  | * |  |   |   | 5 | 1 | LOC101256377 |
| NC_015438.3 | 74936467 | * |   |   | * |   |   |   |  | * |   | * |  |   |  | * |   | 4 | 1 | LOC101253123 |
| NC_015446.3 | 72674154 | * |   |   |   |   | * |   |  | * | * |   |  |   |  | * |   | 4 | 1 | LOC101257900 |
| NC_015446.3 | 71869964 | * |   |   |   |   |   |   |  | * | * |   |  |   |  | * |   | 3 | 1 | LOC101244905 |
| NC_015446.3 | 71979227 | * |   |   |   |   |   |   |  | * | * |   |  |   |  | * |   | 3 | 1 | LOC101247517 |
| NC_015446.3 | 72291083 | * |   |   |   |   |   |   |  | * | * |   |  |   |  | * |   | 3 | 1 | LOC544097    |
| NC_015446.3 | 72461703 | * |   |   |   |   |   |   |  | * | * |   |  |   |  | * |   | 3 | 1 | LOC101263749 |
| NC_015446.3 | 72674063 | * |   |   |   |   |   |   |  | * | * |   |  |   |  | * |   | 3 | 1 | LOC101257900 |
| NC_015446.3 | 72674154 | * |   |   |   |   |   |   |  | * | * |   |  |   |  | * |   | 3 | 1 | LOC101257900 |
| NC_015446.3 | 72856032 |   |   |   |   |   |   |   |  | * | * |   |  |   |  | * |   | 2 | 1 | LOC101254426 |
| NC_015446.3 | 72674063 | * |   |   |   |   |   |   |  | * | * |   |  |   |  | * |   | 2 | 1 | LOC101257900 |
| NC_015443.3 | 49157464 |   |   |   |   |   |   |   |  |   |   |   |  |   |  | * |   | 0 | 1 | LOC543763    |
| NC_015447.3 | 64060576 |   |   |   |   |   |   |   |  |   | * |   |  |   |  |   |   | 0 | 1 | LOC101253039 |
| NC_015447.3 | 65486858 | * |   |   |   |   |   |   |  |   |   |   |  |   |  |   |   | 0 | 1 | LOC101249777 |
| NC_015441.3 | 55117425 | * |   | * | * | * | * |   |  |   |   |   |  | * |  | * |   | 5 | 2 | LOC101267761 |
| NC_015449.3 | 65790093 | * | * |   | * |   |   |   |  |   |   |   |  | * |  |   | * | 3 | 2 | LOC101249717 |

**Table S3.** SNPs validated with rhAmp assays and their sequences.

| SNP ID | Chromosome (SL3.0)       | Position | Sequence [Reference Allele/Alternate Allele]                                      |
|--------|--------------------------|----------|-----------------------------------------------------------------------------------|
| 774    | NC_015446.3/Chromosome 9 | 72672774 | TAGGTTATCCACCAGAAGGTTACTCTAAAGATGCATA[C/T]CCACCACCAGG<br>GTATCCTCAGCAAGGGTATCC    |
| 893    | NC_015446.3/Chromosome 9 | 72501893 | AGAGTCAATCGCAACTTCCGCTTCATATGCCCAATT<br>TC[G/T]CTTAAAAATGGATGATAAAGATGACAGATCCTT  |
| 667    | NC_015446.3/Chromosome 9 | 72501667 | GATATGTCGAGTTGGGAAGTATTCAAATGGTGCTACCA[T/C]ATAGCAAGG<br>CTTAAGAGCAATGTCCGCTGAC    |
| 390    | NC_015446.3/Chromosome 9 | 72500390 | GTCAAAATCAAGACCTTAAGAAGTCGCAATTTAAGAAT[C/T]TGACAGAAG<br>GGAATCCCATCAATTAAGTCTA    |
| 973    | NC_015446.3/Chromosome 9 | 72502973 | TCCAACACAATCCATATATTTTCGACAGATCAGAATCATT[C/G]AACTCATGG<br>TTGTAAGTTAACTGATTTTACC  |
| 22     | NC_015446.3/Chromosome 9 | 72502022 | ATCAGGAAATCTAAACAAGATTTAGATTTTCGACATCTC[T/C]TTCAGTTTCC<br>GCATAAGAGAATCCAGAAAAGCT |
| 807    | NC_015446.3/Chromosome 9 | 72499807 | ACAAAATTGGAGATACTCCAGGCTTGGTAGTCTGCAA[T/C]GAAGGAAGT<br>CAGGTTTTTCGATATGAGCCCCAC   |
| 108    | NC_015446.3/Chromosome 9 | 72502108 | TGGGGAATTGCGATGGAGTGAATTTTAAGGATTTATAGT[G/A]CGTCTCCAC<br>TTGTGCCTTCAGATCTTTAGTTTT |
